# Supplementary material
Source: PubMed Central journal article supplement (PMC4049851)
Supplement: fly-7-184-s01.pdf [file fly-7-184-s01.pdf]

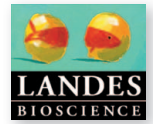

## **Supplemental Material to:**

**Quenta Araye and Kyoichi Sawamura**

**Genetic decay of balancer chromosomes in *Drosophila melanogaster***

**July 2013; Vol 7 (Issue 3)**

**<http://dx.doi.org/10.4161/fly.24466>**

**<http://www.landesbioscience.com/journals/fly/article/24466>**

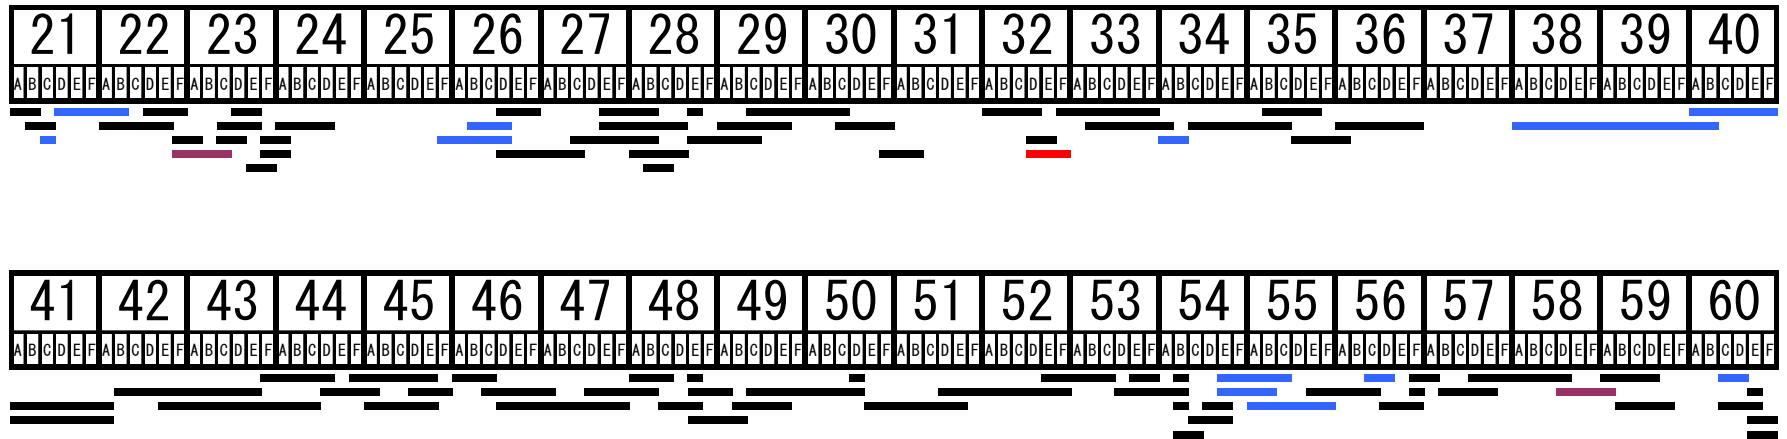

Deficiency mapping of recessive lethal mutations in *In(2LR)SM1* and *In(2LR)Pm*.

Blue bar, lethal over *In(2LR)Pm*

Red bar, lethal over *In(2LR)SM1*

Purple bar, lethal over both *In(2LR)Pm* and *In(2LR)SM1*

According to a Poisson distribution, the number of deficiencies which uncover multiple recessive lethal mutations is expected to be less than 1.14.

No inversion breakpoints are accompanied with recessive lethal mutations.

Figure S1.

**Table S1.** Numbers of flies from the cross of *In(2LR)SM1/In(2LR)Pm* females and

| DGRC No. | <i>In(2LR)SM1/Df</i> | <i>In(2LR)Pm/Df</i> | Control |
|----------|----------------------|---------------------|---------|
| 107147   | 13                   | 18                  | 22      |
| 108717   | 16                   | 40                  | 0       |
| 108848   | 52                   | 0                   | 48      |
| 106828   | 96                   | 0                   | 135     |
| 106871   | 370                  | 434                 | 395     |
| 130344   | 69                   | 60                  | 61      |
| 130323   | 63                   | 62                  | 61      |
| 108889   | 0                    | 0                   | 97      |
| 108890   | 160                  | 153                 | 142     |
| 130332   | 55                   | 55                  | 70      |
| 107967   | 76                   | 104                 | 81      |
| 130336   | 33                   | 45                  | 30      |
| 108811   | 47                   | 56                  | 31      |
| 108815   | 62                   | 86                  | 84      |
| 108178   | 28                   | 54                  | 62      |
| 108906   | 74                   | 0                   | 89      |
| 108730   | 76                   | 0                   | 98      |
| 108739   | 47                   | 62                  | 65      |
| 108756   | 81                   | 67                  | 79      |
| 106706   | 44                   | 47                  | 55      |
| 107969   | 24                   | 19                  | 23      |
| 106823   | 20                   | 8                   | 125     |
| 130347   | 27                   | 35                  | 39      |
| 107968   | 41                   | 31                  | 51      |
| 108892   | 366                  | 359                 | 22      |
| 108894   | 88                   | 93                  | 81      |
| 130359   | 60                   | 91                  | 111     |
| 107489   | 61                   | 44                  | 74      |
| 108797   | 33                   | 62                  | 45      |
| 130358   | 114                  | 128                 | 119     |
| 130342   | 34                   | 38                  | 33      |
| 130343   | 54                   | 45                  | 39      |
| 108471   | 0                    | 118                 | 107     |
| 106825   | 73                   | 90                  | 106     |
| 106992   | 25                   | 24                  | 26      |
| 130337   | 122                  | 0                   | 125     |
| 106874   | 30                   | 45                  | 109     |
| 107112   | 46                   | 45                  | 44      |

|        |     |     |     |
|--------|-----|-----|-----|
| 106710 | 42  | 46  | 48  |
| 106898 | 39  | 35  | 50  |
| 108893 | 69  | 0   | 137 |
| 107971 | 109 | 0   | 123 |
| 108913 | 171 | 148 | 146 |
| 108912 | 70  | 68  | 100 |
| 106723 | 81  | 58  | 65  |
| 107012 | 105 | 83  | 154 |
| 108896 | 114 | 122 | 106 |
| 108897 | 98  | 92  | 89  |
| 107115 | 194 | 214 | 193 |
| 107976 | 114 | 91  | 102 |
| 130334 | 133 | 133 | 137 |
| 106719 | 46  | 74  | 170 |
| 106718 | 73  | 97  | 126 |
| 108904 | 50  | 52  | 54  |
| 108895 | 129 | 159 | 169 |
| 106704 | 80  | 69  | 0   |
| 130345 | 91  | 115 | 116 |
| 107972 | 68  | 77  | 80  |
| 130346 | 91  | 51  | 85  |
| 108477 | 71  | 70  | 66  |
| 108915 | 240 | 294 | 269 |
| 108903 | 80  | 110 | 118 |
| 108816 | 81  | 94  | 93  |
| 108784 | 75  | 82  | 86  |
| 107077 | 93  | 79  | 16  |
| 107079 | 215 | 230 | 249 |
| 130355 | 79  | 72  | 79  |
| 108769 | 169 | 175 | 184 |
| 130352 | 161 | 208 | 147 |
| 108308 | 114 | 152 | 138 |
| 108360 | 65  | 75  | 84  |
| 130353 | 153 | 147 | 152 |
| 130328 | 84  | 84  | 109 |
| 130329 | 224 | 0   | 223 |
| 106815 | 97  | 0   | 61  |
| 106715 | 80  | 0   | 80  |
| 108916 | 63  | 76  | 84  |
| 130330 | 64  | 0   | 79  |

|        |     |     |     |
|--------|-----|-----|-----|
| 130322 | 119 | 114 | 130 |
| 108907 | 117 | 135 | 132 |
| 108849 | 124 | 128 | 114 |
| 107052 | 142 | 157 | 174 |
| 108117 | 82  | 99  | 116 |
| 108898 | 0   | 0   | 0   |
| 107262 | 100 | 82  | 157 |
| 130348 | 208 | 198 | 1   |
| 107424 | 171 | 0   | 198 |
| 130356 | 172 | 151 | 142 |
| 107354 | 157 | 104 | 204 |
| 106881 | 143 | 168 | 149 |
| 107973 | 58  | 41  | 133 |

---

Note: Control flies are *In(2LR)Pm/Bal* or *In(2LR)SM1/Bal*. Because *In(2LR)SM1/Bal* is let derived (majority of the cases), the numbers of *In(2LR)Pm/Bal* flies are shown. Because *In(2LR)SM1/Bal* if *Bal* is *In(2LR)Pm*, the numbers of *In(2LR)SM1/Bal* flies are shown. When *Bal* is *In(2LR)SM1/Gla* flies are shown. The numbers of *Gla/In(2LR)Pm* flies are 57, 123, and 99 for DGRC #106701, #106702, and #106703, respectively. If numbers of control flies are close to zero, it means they have a common recessive lethal mutation(s): DGRC #106704 and #130348. Exceptional fly phenotypes were produced by unknown reasons (e.g., spontaneous mutations, nondisjunctions). DGRC #106709 has a suppressor-of-*Curly* on the Y chromosome (our unpublished observation). DGRC #108898: The offsprings die by the end of the pupal stage.

d tester males

---

Exceptional

---

0

1

0

0

0

0

0

0

0

1

2

0

0

1

0

0

0

0

0

0

0

0

0

0

10

0

0

0

0

0

0

1

2

1

0

0

0

0

0  
0  
0  
0  
2  
0  
2  
1  
0  
1  
1  
2  
0  
2  
1  
0  
0  
0  
0  
0  
0  
0  
2  
0  
0  
0  
0  
1  
0  
3  
0  
1  
0  
1  
0  
0  
0  
0  
2  
0

1  
0  
1  
0  
0  
0  
2  
10  
0  
0  
0  
1  
0

---

that if *Bal* is *Curly-*  
*(2LR)Pm/Bal* is lethal  
*Gla*, the numbers of  
for DGRC #130323,  
*Bal* and *In(2LR)Pm*  
es with unusual  
ns). Apparently  
tion). DGRC



**Table S2.** Calculation for expected number of recessive lethal mutations

| Balancer          | Inversion        | Period ( <i>t</i> ) | Relative length ( <i>L</i> ) | <i>vtL</i> | $\Sigma vtL$ | $\Sigma vtL \times 0.844$ |
|-------------------|------------------|---------------------|------------------------------|------------|--------------|---------------------------|
| <i>In(2LR)Pm</i>  | 21C8-D1;60D1.2   | 2011-1929           | 236/240                      | 12.6       | 12.6         | 10.6                      |
|                   | 22D1.2;33F5-34A1 | 1953-1921           | 70/240                       | 1.5        |              |                           |
| <i>In(2LR)SM1</i> | 42A2.3;58A4-B1   | 1953-1921           | 94/240                       | 2.0        | 12.0         | 10.2                      |
|                   | 22A3-B1;60B-C    | 2011-1953           | 229/240                      | 8.6        |              |                           |

Note: *v* represents the mutation rate, 0.156.  $\Sigma vtL$  is the expected number of recessive lethal mutations on *In(2LR)Pm* and *In(2LR)SM1*. Because we examined 84.4% of the second-chromosome using the deficiencies, the expected number of recessive lethal mutations detected on the balancers is  $\Sigma vtL \times 0.844$ .

**Table S3.** A list for the second-chromosome Kyoto Deficiency kit compiled in Decem

| DGRC No. | Genotype                                                                                                                            |
|----------|-------------------------------------------------------------------------------------------------------------------------------------|
| 107147   | Df(2L)net-PMF/SM6a                                                                                                                  |
| 108717   | Df(2L)BSC4, w[+mC], net[1] cn[1]/SM5                                                                                                |
| 108848   | Df(2L)BSC16, net[1] cn[1]/SM6a                                                                                                      |
| 106828   | Df(2L)ast2/SM1                                                                                                                      |
| 106871   | Df(2L)dp-79b, dp[DA] cn[1]/In(2LR)bw[V1], b[1] bw[V1]                                                                               |
| 130344   | Df(2L)BSC37/CyO                                                                                                                     |
| 130323   | Df(2L)dpp[d14]/In(2LR)Gla, wg[Gla-1]                                                                                                |
| 108889   | Df(2L)C144, dpp[d-ho] ed[1]/In(2LR)Gla, wg[Gla-1] Bc[1] Egfr[E1]                                                                    |
| 108890   | Df(2L)JS32, dpp[d-ho]/CyO, P{ry+t7.2=sevRas1.V12}FK1                                                                                |
| 130332   | Df(2L)BSC28/SM6a, bw[k1]                                                                                                            |
| 107967   | Df(2L)S2590/CyO, P{ry[+t7.2]=sevRas1.V12}FK1                                                                                        |
| 130336   | Df(2L)BSC31, net[1] cn[1]/CyO, b[81f2] rk[81f2]                                                                                     |
| 108811   | Df(2L)tim-02/CyO                                                                                                                    |
| 108815   | y[1] w[*]; Df(2L)drm-P2, P{w[+mC]=lacW}Pdsw[k10101]/SM6b                                                                            |
| 108178   | Df(2L)ed1/CyO; P{ry[+t7.2]=ftz/lac}1                                                                                                |
| 108909   | Df(2L)sc19-8/SM6b; Dp(2;1)B19, y[1], ed[1] dp[o2] cl[1]                                                                             |
| 107243   | Df(2L)sc19-4/In(2L)Cy[L]t[R] In(2R)Cy, Cy[1] amos[Roi-1] cn[2] sp[2] (or[*]); Dp(2;1)B19, y[1] ac[1] sc[1] pn[1] ed[1] dp[o2] cl[1] |
| 108918   | Df(2L)cl-h3/SM6b                                                                                                                    |
| 108906   | In(1)w[m4]; Df(2L)E110/CyO                                                                                                          |
| 108730   | Df(2L)BSC5, w[+mC]/SM6a                                                                                                             |
| 108739   | Df(2L)BSC6, dp[ov1] cn[1]/SM6a                                                                                                      |
| 108756   | w[1118]; Df(2L)BSC7/CyO                                                                                                             |
| 106706   | Df(2L)J-H/SM5                                                                                                                       |
| 107969   | Df(2L)XE-3801/CyO, P{ry[+t7.2]=sevRas1.V12}FK1                                                                                      |
| 106823   | Df(2L)spd, al[1] dp[ov1]/CyO                                                                                                        |
| 130347   | Df(2L)BSC41, dp[ov1] cn[1]/CyO                                                                                                      |
| 107968   | Df(2L)XE-2750/CyO, P{ry[+t7.2]=sevRas1.V12}FK1                                                                                      |
| 108892   | y[1] w[67c23]; Df(2L)Trf-C6R31/CyO                                                                                                  |
| 108894   | In(1)w[m4h], y[1]; Df(2L)TE29Aa-11, dp[*]/CyO                                                                                       |
| 130359   | Df(2L)BSC53, dp[ov1] cn[1]/T(1;2)OR64/SM6a                                                                                          |
| 107489   | Df(2L)N22-14/CyO                                                                                                                    |
| 108797   | Df(2L)BSC17/SM6a                                                                                                                    |
| 106703   | Df(2L)Mdh, cn[1]/Dp(2;2)Mdh3, cn[1]                                                                                                 |
| 130358   | Df(2L)BSC50/SM6a                                                                                                                    |
| 106709   | Df(2L)J39/In(2L)Cy; Dp(2;Y)cb50, Dp(1;Y)B[S]Yy[+]/C(1)RM                                                                            |
| 130342   | Df(2L)BSC32/SM6a, bw[k1]                                                                                                            |
| 130343   | Df(2L)BSC36/SM6a, bw[k1]                                                                                                            |
| 108471   | Df(2L)FCK-20, dp[ov1] bw[1]/CyO, P{ry[+t7.2]=sevRas1.V12}FK1                                                                        |
| 106825   | Df(2L)Prl, Prl[1] nub[Prl]/CyO                                                                                                      |
| 106992   | Df(2L)prd1.7, b[1] Adh[n2] pr[1] cn[1] sca[1]/CyO, P{ry[+t*]=elav-lacZ.H}YH2                                                        |
| 130337   | Df(2L)BSC30/SM6a, bw[k1]                                                                                                            |
| 106874   | Df(2L)b87e25/CyO                                                                                                                    |
| 107112   | Df(2L)TE35BC-24, b[1] pr[1] pk[1] cn[1] sp[1]/CyO                                                                                   |
| 106710   | Df(2L)r10, cn[1]/CyO                                                                                                                |
| 106898   | Df(2L)H20, b[1] pr[1] cn[1] sca[1]/CyO                                                                                              |
| 108900   | Df(2L)TW137, cn[1] bw[1]/CyO, Dp(2;2)M(2)m[+]                                                                                       |
| 106903   | Df(2L)TW50, cn[1]/CyO, Dp(2;2)M(2)m[+]                                                                                              |
| 108893   | Df(2L)TW161, cn[1] bw[1]/CyO                                                                                                        |
| 107971   | Df(2L)C'/CyO                                                                                                                        |
| 108913   | In(2R)bw[VDe2L]Cy[R]/In(2LR)Gla, wg[Gla-1]                                                                                          |

108912 Df(2R)M41A4/SM5  
106701 Df(2R)nap9/In(2LR)Gla, Dp(2;2)BG, wg[Gla-1]  
106723 Df(2R)ST1, Adh[n5] pr[1] cn[\*]/CyO  
107012 Df(2R)cn9/CyO, amos[Roi-1] sp[\*]  
108896 w[118]; Df(2R)H3C1/CyO  
108897 w[118]; Df(2R)H3E1/CyO  
107115 w[1]; Df(2R)Np5, In(2LR)w45-32n, cn[1]/CyO  
107976 w[1]; Df(2R)w45-30n, cn[1]/CyO  
130334 Df(2R)BSC29, cn[1] bw[1] sp[1]/CyO  
106719 w[1118]; Df(2R)B5, px[1] sp[1]/CyO, Adh[nB]  
106718 Df(2R)X1, Mef2[X1]/CyO, Adh[nB]  
108904 Df(2R)stan1, P{ry+t7.2=neoFRT}42D cn[1] sp[1]/CyO  
108895 Df(2R)en-A/CyO  
106704 Df(2R)en30/SM5; Dp(1;Y)B[S]  
130345 Df(2R)BSC39, cn[1] bw[1]/SM6a, bw[k1]  
107972 Df(2R)CB21/CyO; ry[506]  
130346 Df(2R)BSC40/SM6a  
108477 Df(2R)BSC3, w[+mC] unch[k15501] cn[1] bw[1] sp[1]/SM6a, bw[k1]  
108915 Df(2R)vg-C/CyO, P{ry[+t7.2]=sevRas1.V12}FK1  
108903 Df(2R)CX1, b[1] pr[1]/SM1  
108816 Df(2R)BSC18/SM6a  
108784 Df(2R)BSC11/SM6a  
107077 w[a] N[fa-g]; Df(2R)Jp1/CyO  
107079 w[a] N[fa-g]; Df(2R)Jp8, w[+]/CyO  
130355 Df(2R)BSC49/SM6a  
108769 y[1]; Df(2R)P803-Delta15, cn[1]/SM1; sv[spa-pol]  
130352 Df(2R)BSC44/SM6a  
108308 y[1] w[67c23]; Df(2R)k10408, P{w[+mC]=lacW}BEST:GM02553[k10408]/CyO  
108360 Df(2R)robl-c/CyO, y[+]  
130353 Df(2R)BSC45/SM6a  
130328 y[1] w[67c23]; Df(2R)14H10Y-53/SM6a  
130329 y[1] w[67c23]; Df(2R)14H10W-35/SM6a  
106815 Df(2R)Pcl7B/CyO  
106715 Df(2R)PC4/CyO  
108916 y[1] w[\*]/Dp(1;Y)y[+]; Df(2R)P34/CyO  
130330 Df(2R)BSC26/CyO  
130322 Df(2R)BSC22/SM6a  
108907 Df(2R)017/SM1  
108849 Df(2R)BSC19, cn[1] bw[1]/SM6a  
107052 Df(2R)AA21, c[1] px[1] sp[1]/SM1  
108117 Df(2R)Egfr5, b[1] pr[1] cn[1] sca[1]/CyO, P{ry[+t7.2]=sevRas1.V12}FK1  
108898 Dp(1;Y)y[+]/y[1]; Df(2R)X58-12/SM5  
107262 w[\*]; Df(2R)59AD/SM1  
130348 Df(2R)vir130/CyO  
106716 Df(2R)or-BR6, cn[1] bw[1] sp[1]/In(2LR)lt[G16L]bw[V32gR], bw[V32g]  
107424 Df(2R)Px2/SM5  
130356 w[\*]; Df(2R)ED4071, P{w[+mW.ScerFRT.hs3]=3'.RS5+3.3'}ED4071/CyO  
107354 Df(2R)M60E/In(2LR)bw[V32g], bw[V32g]  
106881 Df(2R)ES1, b[1] pr[1] cn[1] wx[wxt]/SM1  
107973 Df(2R)Kr10, b[1] pr[1] Bl[1] c[1]/CyO

---

Note: DGRC #108893, #107012, #107077, #108308, #108849, #107052 and #108117: The use of strains from #36570, #3368, #3518, #5574, #6609, #3467 and #5246) were alternated because a dominant visible marker on exhibits poor expression in the Kyoto strains. DGRC #108909, #107243, #108918, #106703, #106709, #10890 #106701 and #106716: Not included in the present results because the haploinsufficiency regions have to be co duplication. DGRC #108918: Not included in the present results because insufficient offspring were obtained, trials of the cross. DGRC #130343: *SM6a, bw[k1]* was replaced with *CyO, P{ry[+t7.2]=sevRas1.V12}FK1*. E The use of DGRC #103256 was alternated because #106898 was not available at the time.

iber, 2009

---

Deficiency region

---

021A01;021B08  
021B07;021C03  
021C03;021C08  
021D01;022B03  
022A02;022E01  
022D01;022F02  
022F01;023A02  
022F04;023C03  
023C03;023D02  
023C05;023E02  
023D02;023E3  
023E05;023F05  
023F02;024A01  
023F03;024A02  
024A02;024D04  
024C02;025C08  
025A05;025E05  
025D02;026B05  
025F03;026D11  
026B01;026D02  
026D03;026F07  
026D10;027C01  
027C05;028B04  
027E02;028D01  
027E1;028B3  
028A04;028D09  
028B05;028C09  
028E01  
028E04;029C01  
029A02;29E01  
029C01;030C09  
030C03;030F01  
030D;031F  
030F05;31B01  
031C;032E5  
032A01;032D01  
032D01;032E01  
032D01;032F3  
032F01;033F02  
033B03;034A02  
034A03;034B09  
034C01;035C01  
035B04;035E2  
035D01;036A07  
036A08;036F01  
036C02;037B10  
036E04;038A07  
038A06;040B01  
040A01;h35  
041 → h42;42A03

041 → h44;42A02  
042A01;042F01  
042B03;043E18  
042E;044C1  
043F;044D08  
044D01;045A01  
044F12;045E03  
045A06;045E03  
045D03;045F06  
046A1;046C12  
046C2;047A01  
046D07;047F16  
047D07;048B02  
048A03;048C08  
048C05;048E01  
048E;049A  
048E01;048E10  
048E12;049B06  
049B02;049E02  
049C01;050D05  
050D01;050D07  
050E06;051E04  
051D03;052F09  
052E1;53C01  
053D09;54B10  
053E;053F11  
054B01;54B10  
054B16  
054B17;054C04  
054C08;54E07  
054D01;054E07  
054E05;055B07  
054E08;055C01  
055A1;055F2  
055E06;056C01  
056C04;056D10  
056D07;056F12  
056F05;056F15  
056F12-;057A04  
057B19;057E06  
057D02;058D01  
058D01;059A01  
059A01;059D04  
059B;059E01  
059D05;060B08  
060C06;060D09  
060C08;60E08  
060E06;060E11  
060E06;060F02  
060E10;060F05

---

1 Bloomington (BL  
n the balancer  
0, #106903,  
omplemented by a  
despite several  
GRC #106898:
